# Supplementary material for: Safety and Effectiveness of Vedolizumab for the Treatment of Pediatric Patients with Very Early Onset Inflammatory Bowel Diseases
Source: MDPI journal article supplement (doi:10.3390/jcm10132997), 2021-07-05
Supplement: s1 [file s1]

**Table S1.** Baseline characteristics of the study group.

| <b>Baseline</b>                                                                                                              | <b>Total cohort (N=16)</b>                                          |
|------------------------------------------------------------------------------------------------------------------------------|---------------------------------------------------------------------|
| Males                                                                                                                        | 10 (62,5%)                                                          |
| Female                                                                                                                       | 6 (37.5%)                                                           |
| Median age at disease diagnosis; mth, yrs                                                                                    | 33.7 mth (6.6 mth – 4.5 yr)                                         |
| Median age range at vedo initiation; yrs                                                                                     | 6.5 (2.2 – 16.5)                                                    |
| Crohn's disease                                                                                                              | 4/16 (25%)                                                          |
| Ulcerative colitis                                                                                                           | 12/16 (75%)                                                         |
| IFX exposure                                                                                                                 | 15/16 (93.75%)                                                      |
| ADA exposure                                                                                                                 | 9/16 (56.3%)                                                        |
| Other biologics exposure                                                                                                     | 4/16 (25%)                                                          |
| <b>IFX discontinuation reason:</b><br><br>- non-response<br><br>- allergic reaction<br><br>- loss of response<br><br>- other | 9/15 (60%)<br><br>3/15 (20%)<br><br>1/15 (6,7%)<br><br>2/15 (13,3%) |
| <b>ADA discontinuation reason:</b>                                                                                           |                                                                     |

|                                                                                                                                                                                                                               |                                                                                       |
|-------------------------------------------------------------------------------------------------------------------------------------------------------------------------------------------------------------------------------|---------------------------------------------------------------------------------------|
| <ul style="list-style-type: none"> <li>- non-response</li> <li>- allergic reaction</li> <li>- loss of response</li> <li>- other</li> </ul>                                                                                    | <p>6/9 (66.7%)</p> <p>0/9</p> <p>2/9 (22.2%)</p> <p>1/9 (11.1%)</p>                   |
| <p><b>Previous conventional therapies</b></p> <ul style="list-style-type: none"> <li>- Systemic steroids</li> <li>- Budesonide MMX</li> <li>- 5-ASA</li> <li>- Azathioprine therapy</li> <li>- Cyclosporin therapy</li> </ul> | <p>16 (100%)</p> <p>8 (50%)</p> <p>15 (93.8%)</p> <p>14 (87.5%)</p> <p>10 (62.5%)</p> |
| FCP; ug/g                                                                                                                                                                                                                     | 1943.1                                                                                |

### Abbreviations:

Months – mth

Years – yr

Vedolizumab - vedo

Infliximab – IFX

Adalimumab – ADA

5-aminosalicylate acid – 5-ASA

Body Mass Index – BMI

Pediatric Crohn’s disease Activity Index - PCDAI

Pediatric Ulcerative Colitis Index – PUCAI

Fecal calprotectin – FCP

**Table S2.** Patient's characteristics after vedolizumab initiation comparing to baseline.

| <b>N=16</b>                               | <b>Baseline</b> | <b>4<sup>th</sup> dose week</b> | <b>10<sup>th</sup> dose week</b> |
|-------------------------------------------|-----------------|---------------------------------|----------------------------------|
| Median BMI: percentile                    | 40              | 40                              | 39                               |
| <b>Laboratory parameters</b>              |                 |                                 |                                  |
| - mean Hemoglobin; mmol/l                 | 10.5            | 11.8                            | 11,7                             |
| - mean ESR; mm/h                          | 29              | 18                              | 19                               |
| - mean Albumin; g/l                       | 38.5            | 42.9                            | 41,3                             |
| <b>Adverse events/ No of patients</b>     | 0               | 1                               | -                                |
| -infection of the upper respiratory tract | 0               | 0                               | 2                                |
| - arthralgia                              |                 |                                 |                                  |

PCDAI - pediatric Crohn's disease activity index.

PUCAI - Pediatric Ulcerative Colitis Index

BMI – body mass index

ESR - Erythrocyte sedimentation rate

**Table S3.** Relationship between vedolizumab and surgery in 3 patients who underwent surgery.

| <b>Patient</b> | <b>Number of doses of vedolizumab</b> | <b>Number of weeks between vedolizumab commencement and surgery procedure</b> | <b>Number of weeks between last dose of vedolizumab and surgery procedure</b> |
|----------------|---------------------------------------|-------------------------------------------------------------------------------|-------------------------------------------------------------------------------|
| Patient A      | 3                                     | 13                                                                            | 6                                                                             |
| Patient B      | 3                                     | 108                                                                           | 102                                                                           |
| Patient C      | 9                                     | 58                                                                            | 6                                                                             |

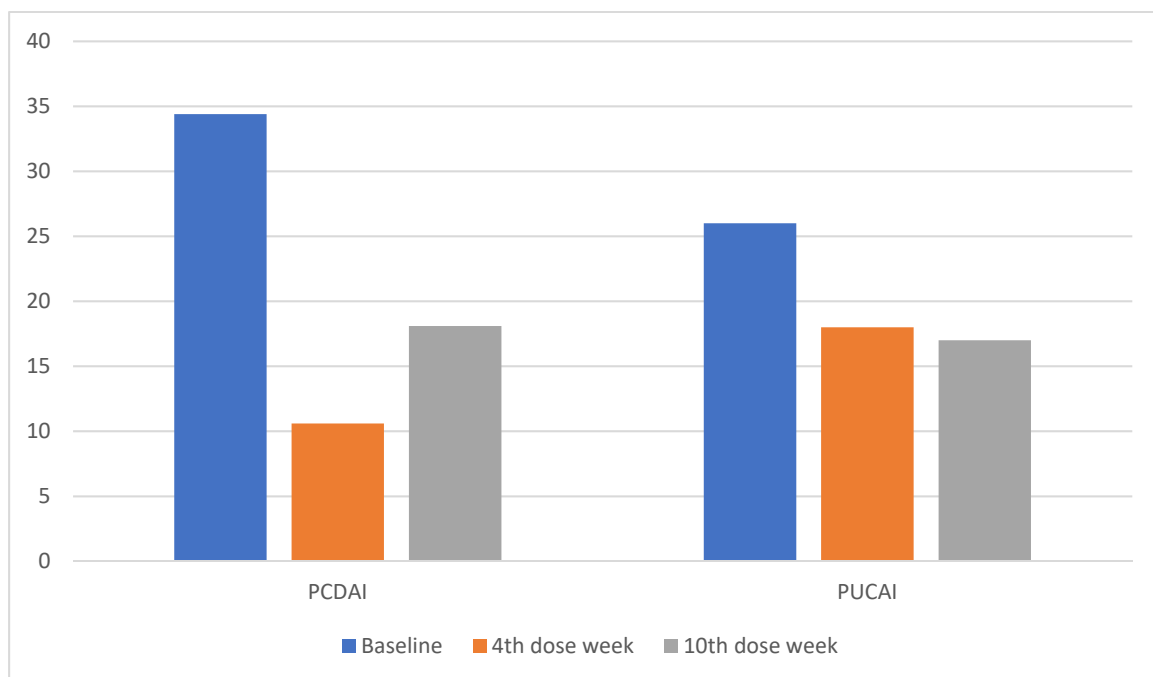

**Figure S1.** Patients' disease clinical activity (PCDAI for CD and PUCAI for UC) between baseline and after vedolizumab commencement (4<sup>th</sup> and 10<sup>th</sup> week dose).

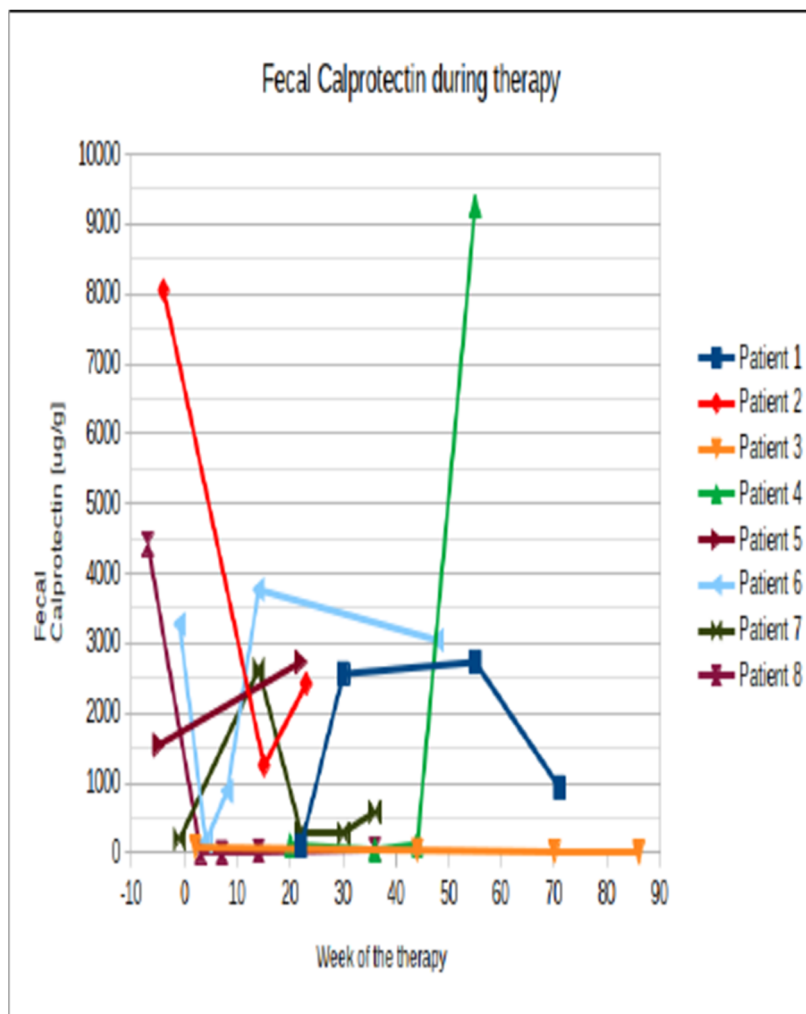

**Figure S2.** Values of fecal calprotectin for 8 patients tested for this marker before and after vedolizumab commencement.
